# Supplementary material for: Genome-guided identification of novel head-to-tail cyclized antimicrobial peptides, exemplified by the discovery of pumilarin
Source: PubMed Central journal article supplement (PMC5695211; doi:10.1099/mgen.0.000134), 2017-09-25
Supplement: mgen-3-134-s001.pdf [file mgen-3-134-s001.pdf]

|                                  |                       |                       |
|----------------------------------|-----------------------|-----------------------|
| <i>L. monocytogenes</i>          | Indicator strain      | Laboratory collection |
| <i>B. cereus</i> ATCC14579       | Indicator strain      | Laboratory collection |
| <i>S. aureus</i> RN6390B         | Indicator strain      | Laboratory collection |
| <i>E. coli</i> DH5a              | Indicator strain      | Laboratory collection |
| <i>Lactococcus lactis</i> NZ9000 | Indicator strain      | Laboratory collection |
| <i>Mycobacterium smegmatis</i>   | Indicator strain      | Laboratory collection |
| <i>S. aureus</i> MRSA CAL        | MRSA Indicator strain | Girbe Buist UMCG      |
| <i>S. aureus</i> MRSA MW2        | MRSA Indicator strain | Girbe Buist UMCG      |

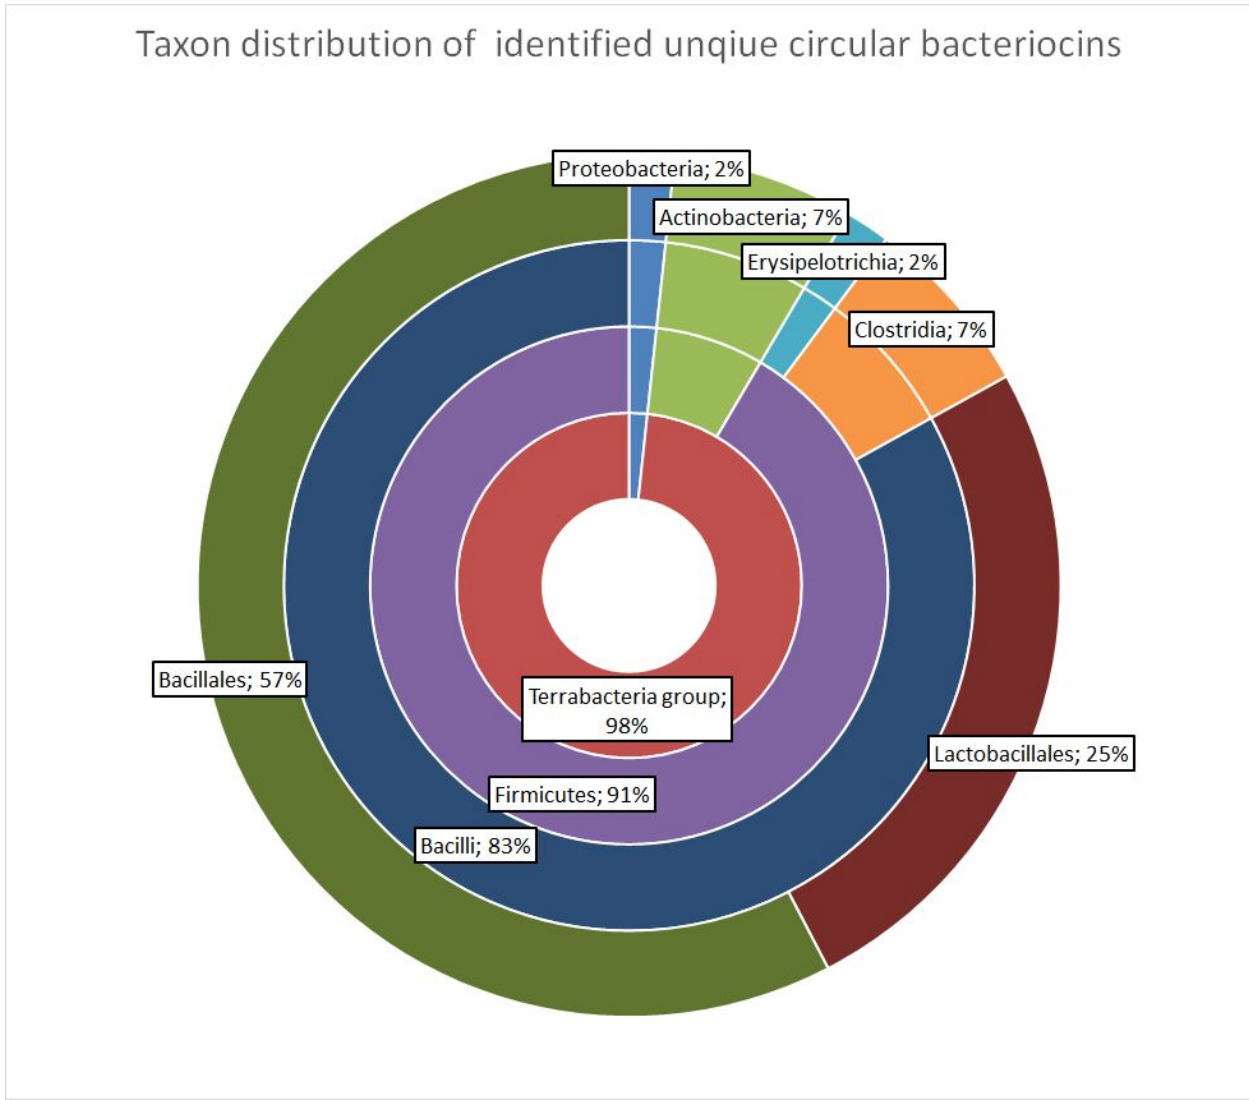

**Figure S4.** Distribution of the identified circular bacteriocins over the different taxa. In total 59 unique (at least one AA difference in the leader or core peptide) sequences were identified.

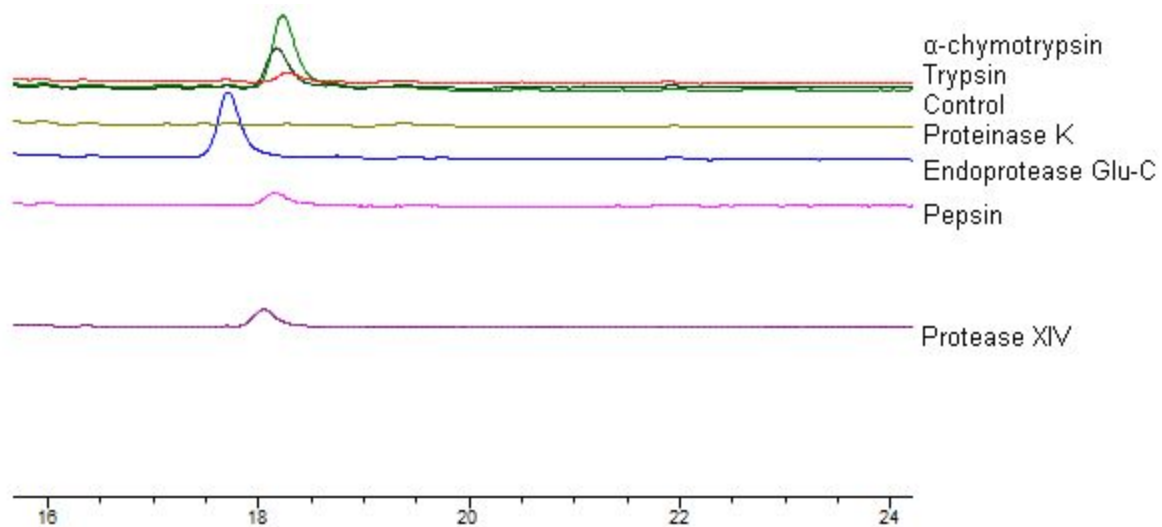

**Figure S5.** HPLC profile at 280 nm of pumilarin (control) and pumilarin cleaved with different proteases. Light green corresponds to the uncleaved peptide, dark green to the proteolysis with trypsin, red with  $\alpha$ -chymotrypsin, brown with proteinase K, blue with endoprotease Glu-C, pink with pepsin and purple with protease XIV. The separation was performed according to (4).

1. Kalmokoff ML, Cyr TD, Hefford MA, Whitford MF, Teather RM. Butyrivibriocin AR10, a new cyclic bacteriocin produced by the ruminal anaerobe *Butyrivibrio fibrisolvens* AR10: characterization of the gene and peptide. *Can J Microbiol.* 2003 Dec;49(12):763–73.
2. Kemperman R, Kuipers A, Karsens H, Nauta A, Kuipers O, Kok J. Identification and characterization of two novel clostridial bacteriocins, circularin A and closticin 574. *Appl Environ Microbiol.* 2003 Mar;69(3):1589–97.
3. Wirawan RE, Swanson KM, Kleffmann T, Jack RW, Tagg JR. Uberolysin: a novel cyclic bacteriocin produced by *Streptococcus uberis*. *Microbiology.* 2007 May;153(Pt 5):1619–30.
4. Montalbán-López M, Spolaore B, Pinato O, Martínez-Bueno M, Valdivia E, Maqueda M, et al. Characterization of linear forms of the circular enterocin AS-48 obtained by limited proteolysis. *FEBS Lett.* 2008 Sep 22;582(21-22):3237–42.
